# Supplementary material for: Non-Mendelian Dominant Maternal Effects Caused by CRISPR/Cas9 Transgenic Components in Drosophila melanogaster
Source: PubMed Central journal article supplement (PMC5100867; doi:10.1534/g3.116.034884), 2016-09-16
Supplement: supp_g3.116.034884_FigureS1.pdf [file supp_g3.116.034884_FigureS1.pdf]

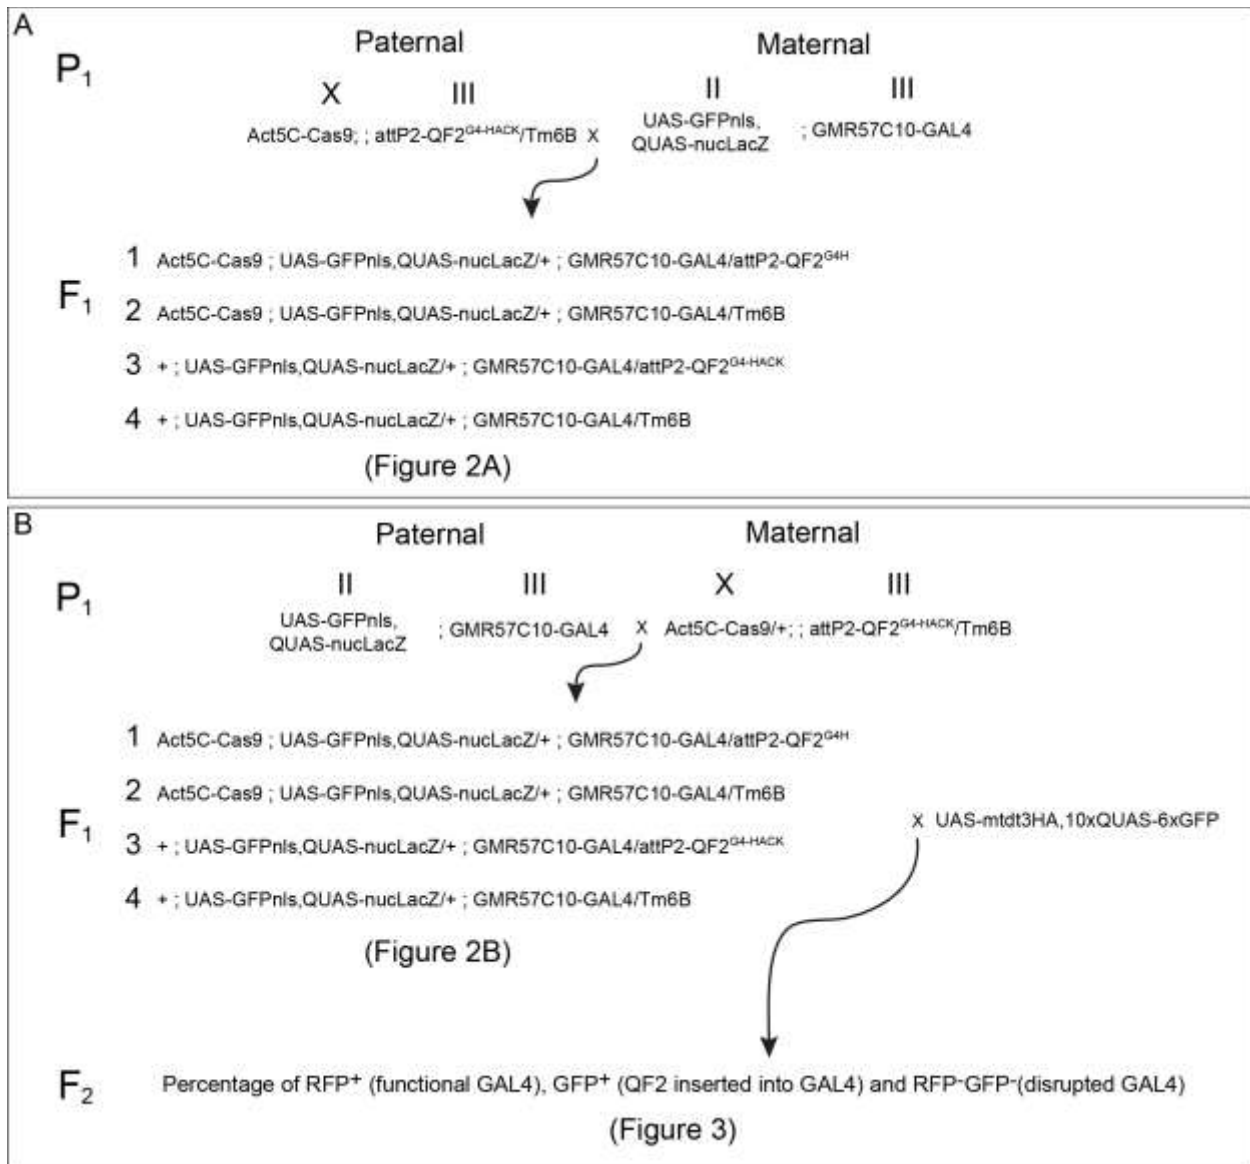

**Figure S1. Details on genetic crosses used in this study.** Diagramed are the crosses and genotypes for animals used in Figure 2 and Figure 3.
