# Supplementary material for: Non-Mendelian Dominant Maternal Effects Caused by CRISPR/Cas9 Transgenic Components in Drosophila melanogaster
Source: PubMed Central journal article supplement (PMC5100867; doi:10.1534/g3.116.034884), 2016-09-16
Supplement: supp_g3.116.034884_FigureS3.pdf [file supp_g3.116.034884_FigureS3.pdf]

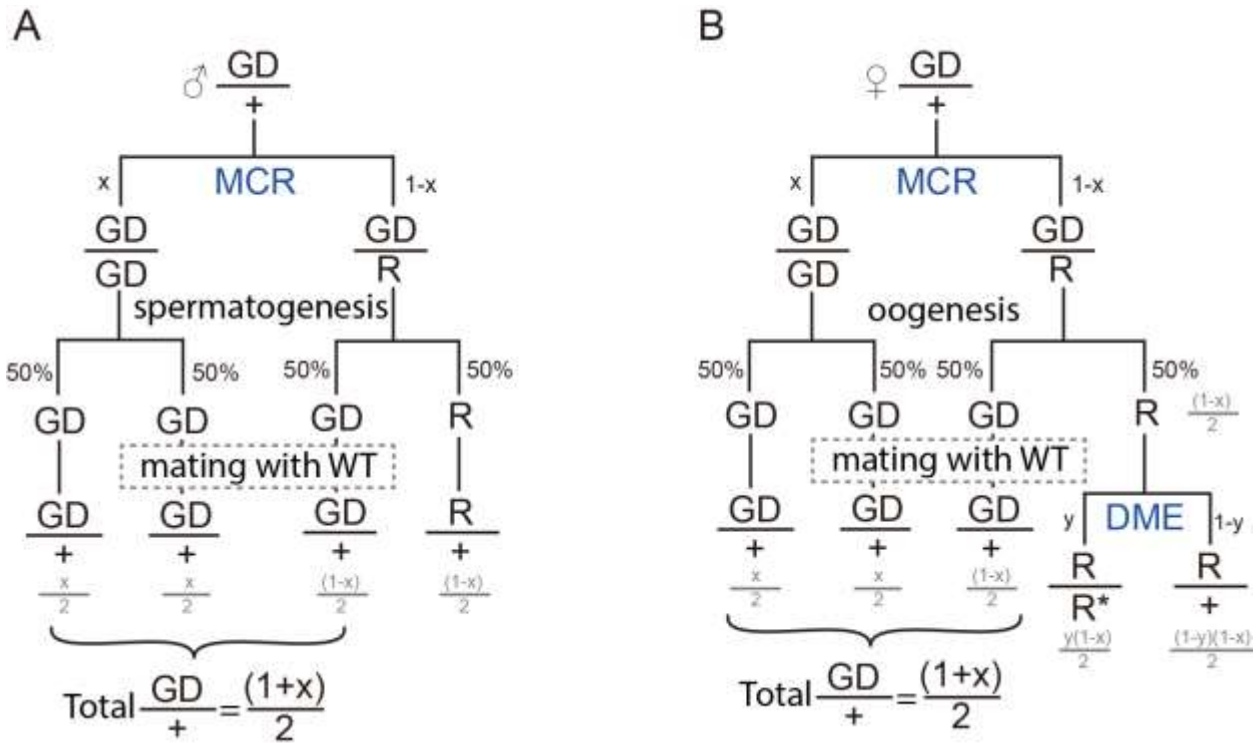

**Figure S3. Summaries for estimating dominant maternal effects on gene drive resistance.** The effects of MCR-directed gene drive on **A**) male or **B**) female resistant gametes. 'x' indicates the successful rate of Gene Drive through mutagenic chain reaction, and '1-x' is the rate for acquisition of Gene Drive Resistance (R) by mutation at the target site in the next generation. In **B**) female gametes, fertilized eggs containing Resistant gene drive alleles will not have templates for Gene Drive, but will contain maternally deposited Cas9 and gRNAs. This will lead to Cas9/gRNA-directed mutation of the target site at frequency 'y'. Avoiding this dominant maternal effect (DME) can be calculated as '1-y'. R indicates a resistant mutation obtained by failure of MCR. R\* indicates a resistant mutation obtained by a dominant maternal effect.
